# Supplementary material
Source: HighWire-hosted journal article supplement (https://www.jneurosci.org/highwire/filestream/600906/field_highwire_adjunct_files/0/Supplemental_Material.pdf)
Supplement: Supplemental_Material.pdf [file Supplemental_Material.pdf]

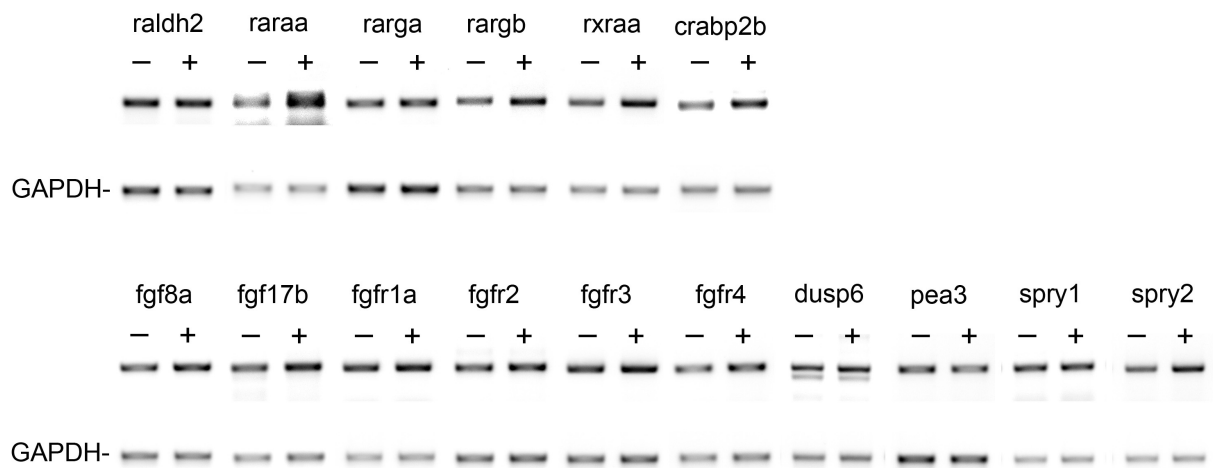

Supplemental Fig. 1 Retinoic acid (upper row) and FGF (lower row) pathway genes that showed little or no regulation in the lesioned spinal cord. PCR analyses for lesioned (+; 14 days post-lesion) and unlesioned (-) spinal cords, using GAPDH as a standard, are shown.

Supplemental Table 1: List of primers used for amplification of genes related to FGF and retinoic acid signaling.

| Gene    | forward primer        | reverse primer         | Annealing Temperature |
|---------|-----------------------|------------------------|-----------------------|
| fgf3    | GAGGAGCTCCAAGACGTAGG  | ATTGATGGACACATACCACTGC | 57                    |
| fgf8a   | CTGGTACATGGCCTTCACG   | AGCGCTTACACATCCTGTGC   | 56                    |
| fgf17b  | TGTGGAGGCTGAAGTATGAGG | GTGTCGTGTGTTAGCATGTGG  | 57                    |
| fgfr1a  | AAGAAGCTACATGCGGTTCC  | TTCAGCCACTGAATGTGAGG   | 57                    |
| fgfr2   | GATGTCGTTGAACGCTCTCC  | CACGATCACCACCATACAGG   | 57                    |
| fgfr3   | GGACAACGTGATGAAGATTGC | GCTCGAACGGTACAGAGAGG   | 57                    |
| fgfr4   | CTTCTCTCCGACCATTCAAC  | GCCATTGGCTTCTTATCAGC   | 57                    |
| dusp6   | GACGGTAGAGTGGCTGAAGG  | GATGTCCGAGGAGTCAGAGC   | 56                    |
| pea3    | CAACGAAGGCTACTCCAACC  | ATTCCGCCTTCAGACTTGG    | 56                    |
| spry1   | AGATGAGCATTGCTGTGTGG  | GTGATGCTGTGGTGTTCTGG   | 56                    |
| spry2   | GCTCGGTTCTGGAGTAGC    | ATCTGTCAAGGTGCCTCTGG   | 56                    |
| spry4   | AGGAACACGACCTACAGATGG | GAGTAGGAGCTGCGTGATCC   | 56                    |
| raldh2  | CAGGATCGACTGAGGTAGGC  | CTTCAGTGATGCCACTCTGG   | 56                    |
| raraa   | TATCGCTGCACCATATCACG  | CTCAAGACAACGGCTGATCC   | 56                    |
| rarab   | AGATGATCGAGCAGGTGAGG  | GACAGATGGCGCTAAGAAGC   | 56                    |
| rarga   | GAGACTGGCCTCCTTAGTGC  | TCGTCATCCTCCTCTTCTGG   | 56                    |
| rargb   | TGGAGTCAGCTCTTGTGAGG  | TCTGGTCTGCGATAGTGAGC   | 56                    |
| rxraa   | AGTGAGAACGAAGTGGAGTCC | ACAATGGCTCGAAGACATCC   | 56                    |
| rxrga   | CATCACCTCCTCCTCTCTGG  | ACCGCCTCTCTTTCATGC     | 56                    |
| rxrgb   | TGGCAATGAAGACATCAAGC  | CGACTGACAGTTCTGCATCC   | 56                    |
| crabp2a | ACAGAACGGAAGATGGATCG  | CTGTTTCGCAGCTAATCTTGC  | 57                    |
| crabp2b | CCAGCGTCTCAGTCTAGTTGG | ACTGGCACAGGACATGAGG    | 57                    |
| cyp26a  | TCCGAACCTGCAGAAGTCCTC | GCTTCCACCAGTTCTTGCTC   | 56                    |
